# Supplementary material
Source: PubMed Central journal article supplement (PMC4397483)
Supplement: NIHMS289101-supplement-Figure_Legend.pdf [file NIHMS289101-supplement-Figure_Legend.pdf]

**Figure S1.** KC, mDC and monocyte expression of B7-H1s. \*,  $p < 0.01$ , for KC vs. other groups, \*\*,  $p < 0.05$  KC B7-H1 expression tumor tissues. vs. non-tumor tissues. n= 15 patients.

**Figure S2.** The location of PD-1<sup>+</sup> cells and B7-H1<sup>+</sup> cells in HCC tumor tissues. *A*, Representative data for PD-1<sup>+</sup> cells (green) and B7-H1<sup>+</sup> cells (red) were shown in peri-tumor stroma (white arrow) and tumor nest (yellow arrow), DAPI nuclear (blue), and ×100 magnification. *B*, Numbers of PD-1<sup>+</sup> cells and B7-H1<sup>+</sup> cells in peri-tumor stroma vs. tumor nest. \*,  $P < 0.01$ , number of PD-1<sup>+</sup> cells. \*\*,  $P < 0.05$ , number of B7-H1<sup>+</sup> cells. n= 8 patients.
