# Supplementary material
Source: PubMed Central journal article supplement (PMC4397483)

*Wu et al.* **Figure S1**

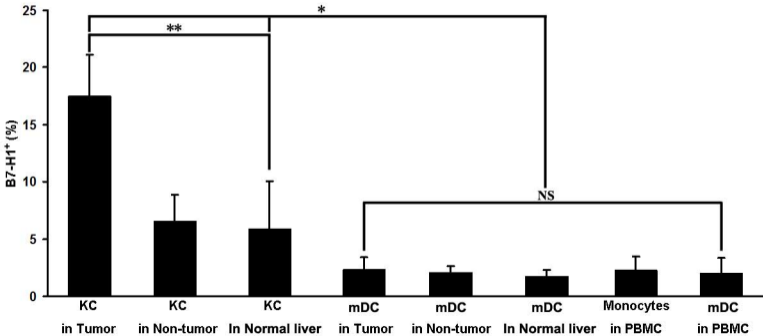

Supplement: NIHMS289101-supplement-Figure_1.pdf [file NIHMS289101-supplement-Figure_1.pdf]

**A**

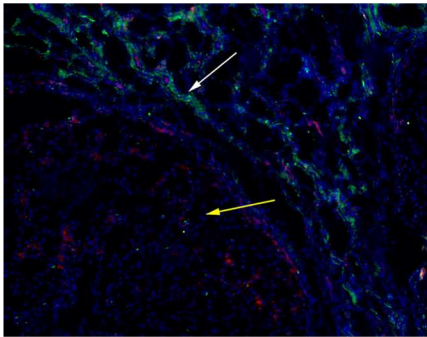

**B**

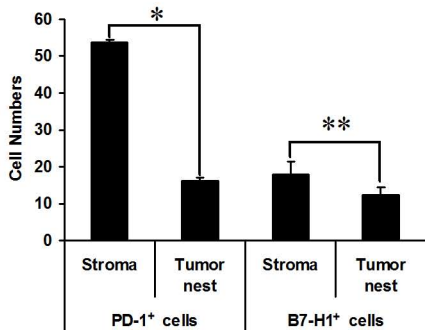

Supplement: NIHMS289101-supplement-Figure_2.pdf [file NIHMS289101-supplement-Figure_2.pdf]
